# Supplementary material for: Gene–Gene Interactions Reduce Aminoglycoside Susceptibility of Pseudomonas aeruginosa through Efflux Pump-Dependent and -Independent Mechanisms
Source: MDPI journal article supplement (doi:10.3390/antibiotics12010152), 2023-01-11
Supplement: s1 [file s1]

**Table S1.** Bacterial strains and plasmids used in the study

| Bacterial Strains/ Plasmids                                               | Genotype/ relevant characteristics                                                                       | Reference  |
|---------------------------------------------------------------------------|----------------------------------------------------------------------------------------------------------|------------|
| <b><i>Pseudomonas aeruginosa</i> reference strains</b>                    |                                                                                                          |            |
| PAO1                                                                      | Laboratory reference strain                                                                              | [1]        |
| <b>PAO1 mutants</b>                                                       |                                                                                                          |            |
| $\Delta mexZ$                                                             | Deletion of <i>mexZ</i> gene in PAO1                                                                     | [2]        |
| $\Delta mexXY$                                                            | Deletion of <i>mexXY</i> genes in PAO1                                                                   | [2]        |
| <i>mexY</i> <sub>G287S</sub>                                              | Engineered mutation in the genome of PAO1 that replaced amino acid G with S at <i>mexY</i> codon 287     | This study |
| <i>fusAI</i> <sub>R680C</sub>                                             | Engineered mutation in the genome of PAO1 that replaced amino acid R with C at codon 680 of <i>fusAI</i> | This study |
| <i>fusAI</i> <sub>Y683D</sub>                                             | PAO1 with spontaneous mutation that replaced amino acid Y with D at codon 683 of <i>fusAI</i>            | [3]        |
| <i>fusAI</i> <sub>D327S</sub>                                             | PAO1 with spontaneous mutation that replaced amino acid D with S at codon 327 of <i>fusAI</i>            | [3]        |
| <i>amgS</i> <sub>V121G</sub>                                              | Engineered mutation in the genome of PAO1 that replaced amino acid V with G at codon 121 of <i>amgS</i>  | This study |
| $\Delta mexZ$ <i>mexY</i> <sub>G287S</sub>                                | $\Delta mexZ$ <i>mexY</i> <sub>G287S</sub> double mutant                                                 | This study |
| $\Delta mexZ$ <i>fusAI</i> <sub>R680C</sub>                               | $\Delta mexZ$ <i>fusAI</i> <sub>R680C</sub> double mutant                                                | This study |
| $\Delta mexXY$ <i>fusAI</i> <sub>R680C</sub>                              | $\Delta mexXY$ <i>fusAI</i> <sub>R680C</sub> double mutant                                               | This study |
| $\Delta mexZ$ <i>fusAI</i> <sub>Y683D</sub>                               | $\Delta mexZ$ <i>fusAI</i> <sub>Y683D</sub> double mutant                                                | This study |
| $\Delta mexZ$ <i>fusAI</i> <sub>D327S</sub>                               | $\Delta mexZ$ <i>fusAI</i> <sub>D327S</sub> double mutant                                                | This study |
| $\Delta mexZ$ <i>amgS</i> <sub>V121G</sub>                                | $\Delta mexZ$ <i>amgS</i> <sub>V121G</sub> double mutant                                                 | This study |
| $\Delta mexXY$ <i>amgS</i> <sub>V121G</sub>                               | $\Delta mexXY$ <i>amgS</i> <sub>V121G</sub> double mutant                                                | This study |
| <i>mexY</i> <sub>G287S</sub> <i>amgS</i> <sub>V121G</sub>                 | <i>mexY</i> <sub>G287S</sub> <i>amgS</i> <sub>V121G</sub> double mutant                                  | This study |
| <i>mexY</i> <sub>G287S</sub> <i>fusAI</i> <sub>R680C</sub>                | <i>mexY</i> <sub>G287S</sub> <i>fusAI</i> <sub>R680C</sub> double mutant                                 | This study |
| <i>fusAI</i> <sub>R680C</sub> <i>amgS</i> <sub>V121G</sub>                | <i>fusAI</i> <sub>R680C</sub> <i>amgS</i> <sub>V121G</sub> double mutant                                 | This study |
| $\Delta mexZ$ <i>amgS</i> <sub>V121G</sub> <i>fusAI</i> <sub>R680C</sub>  | $\Delta mexZ$ <i>amgS</i> <sub>V121G</sub> <i>fusAI</i> <sub>R680C</sub> triple mutant                   | This study |
| $\Delta mexXY$ <i>amgS</i> <sub>V121G</sub> <i>fusAI</i> <sub>R680C</sub> | $\Delta mexXY$ <i>amgS</i> <sub>V121G</sub> <i>fusAI</i> <sub>R680C</sub> triple mutant                  | This study |
| $\Delta mexZ$ <i>fusAI</i> <sub>R680C</sub> <i>mexY</i> <sub>G287S</sub>  | $\Delta mexZ$ <i>fusAI</i> <sub>R680C</sub> <i>mexY</i> <sub>G287S</sub> triple mutant                   | This study |
| $\Delta mexZ$ <i>amgS</i> <sub>V121G</sub> <i>mexY</i> <sub>G287S</sub>   | $\Delta mexZ$ <i>amgS</i> <sub>V121G</sub> <i>mexY</i> <sub>G287S</sub> triple mutant                    | This study |

|                                                                                               |                                                                                                                |            |
|-----------------------------------------------------------------------------------------------|----------------------------------------------------------------------------------------------------------------|------------|
| <i>fusAI</i> <sub>R680C</sub> <i>amgS</i> <sub>V121G</sub> <i>mexY</i> <sub>G287S</sub>       | <i>fusAI</i> <sub>R680C</sub> <i>amgS</i> <sub>V121G</sub> <i>mexY</i> <sub>G287S</sub> triple mutant          | This study |
| <i>ΔmexZ fusAI</i> <sub>R680C</sub> <i>amgS</i> <sub>V121G</sub> <i>mexY</i> <sub>G287S</sub> | <i>ΔmexZ fusAI</i> <sub>R680C</sub> <i>amgS</i> <sub>V121G</sub> <i>mexY</i> <sub>G287S</sub> quadruple mutant | This study |

#### Strains of *Escherichia coli*

|      |                                                                            |     |
|------|----------------------------------------------------------------------------|-----|
| JM83 | <i>ara</i> , <i>Δ(lac-proAB) rpsL(strA)</i> , <i>φ80</i> , <i>lacZΔM15</i> | [4] |
| ST18 | S 17 <i>λpirΔhemA</i>                                                      | [5] |

#### Plasmids used in the study

|                                         |                                                                                                                |            |
|-----------------------------------------|----------------------------------------------------------------------------------------------------------------|------------|
| pEX18Tc                                 | pMB1 replicon, <i>oriT</i> , <i>sacB</i> , Tc <sup>R</sup> , allelic exchange vector                           | [6]        |
| pEX18Tc:: <i>ΔmexXY</i>                 | pEX18Tc derivative carrying <i>mexXY</i> ( <i>PA2018-PA2019</i> ) flanking regions                             | [2]        |
| pEX18Tc:: <i>ΔmexZ</i>                  | pEX18Tc derivative carrying <i>mexZ</i> ( <i>PA2020</i> ) flanking regions                                     | [2]        |
| pEX18Tc:: <i>mexY</i> <sub>G287S</sub>  | pEX18Tc containing DNA fragment with a mutation that encodes amino acid S instead of G at residue 287 in MexY  | This study |
| pEX18Tc:: <i>fusAI</i> <sub>R680C</sub> | pEX18Tc containing DNA fragment with a mutation that encodes amino acid C instead of R at residue 680 in FusA1 | This study |
| pEX18Tc:: <i>amgS</i> <sub>V121G</sub>  | pEX18Tc containing DNA fragment with a mutation that encodes amino acid G instead of V at residue 121 in AmgS  | This study |

**Table S2.** Primers used in the study.

| Primers                                                          | Sequences                                       | Reference  |
|------------------------------------------------------------------|-------------------------------------------------|------------|
| <b><i>mexXY</i> deletion Primers</b>                             |                                                 |            |
| <i>mexXY_F1</i>                                                  | 5' CCCCC <u>GGTACC</u> GAGTCGGCTGATG ACCTACA 3' | [2]        |
| <i>mexXY_R1</i>                                                  | 5'GGGGG <u>TCTAGA</u> GTACCGCTGTTCTTCCTGGT 3'   | [2]        |
| <i>mexXY_F2</i>                                                  | 5' CCCCC <u>TCTAGAT</u> GTCCCTCGATTC GTGAACT 3' | [2]        |
| <i>mexXY_R2</i>                                                  | 5' GGGGG <u>AAGCTT</u> GCTCTACATCGAC GGCAAG 3'  | [2]        |
| <b><i>mexXY</i> deletion screening Primers</b>                   |                                                 |            |
| <i>PA2017_F</i>                                                  | 5' GCA GCC TGT ACG TGG TCA 3'                   | [2]        |
| <i>mexZ_R</i>                                                    | 5' GGG TTT TCT GGG ATT CCT CT 3'                | [2]        |
| <b><i>mexZ</i> deletion Primers</b>                              |                                                 |            |
| <i>mexX_F</i>                                                    | 5' CCCCC <u>GAATTC</u> GTTCTCGACGATCACCCACT 3'  | [2]        |
| <i>mexX_R</i>                                                    | 5' GGGGG <u>TCTAGA</u> GGGTTTTCTGGGATTCCTCT 3'  | [2]        |
| <i>PA2022_F</i>                                                  | 5' CCCCC <u>TCTAGA</u> CGCAGTTCTCCCTACCTGTT 3'  | [2]        |
| <i>PA2022_R</i>                                                  | 5' GGGGG <u>AAGCTT</u> CGCAGTATCTGGCTGTCGTA 3'  | [2]        |
| <b><i>mexZ</i> deletion screening Primers</b>                    |                                                 |            |
| <i>mexZ_SR_F</i>                                                 | 5' GTGTCCCTCGATTCGTGAAC 3'                      | [2]        |
| <i>mexZ_SR_R</i>                                                 | 5' CGTGAAGCTACCGTGACAGA 3'                      | [2]        |
| <b><i>mexY</i><sub>G287S</sub> mutation engineering primers</b>  |                                                 |            |
| <i>mexY_F</i>                                                    | 5' GGGGA <u>AATTC</u> CCTGTTCCGCAATCCGCATC 3'   | This study |
| <i>mexY_R</i>                                                    | 5'GGGGG <u>ATCCAGT</u> CCTTCAGGGTGGCGAAG 3'     | This study |
| <b><i>mexY</i><sub>G287S</sub> mutation screening primers</b>    |                                                 |            |
| <i>mexY_scr_F</i>                                                | 5' CTCGTCCAACGTGTTGCAGG 3'                      | This study |
| <i>mexY_scr_R</i>                                                | 5' AACGCCGAGGTGTCATAGGG 3'                      | This study |
| <b><i>fusA1</i><sub>R680C</sub> mutation engineering primers</b> |                                                 |            |
| <i>fusA1_F</i>                                                   | 5' GGGGG <u>TCTAGA</u> TTACTCGATGATCTTGGAAC 3'  | This study |
| <i>fusA1_R</i>                                                   | 5' CCCCC <u>AAGCTT</u> GAAGCCGAGATCAAGGAAGG 3'  | This study |
| <b><i>fusA1</i><sub>R680C</sub> mutation screening primers</b>   |                                                 |            |
| <i>fusA1_scr_F</i>                                               | 5' GTATTCAACGTGCGAGGTGT 3'                      | This study |

|                                                                 |                                                |            |
|-----------------------------------------------------------------|------------------------------------------------|------------|
| <i>fusAI_scr_R</i>                                              | 5' GTTCAAGATCGCTGCTTCCA 3'                     | This study |
| <b><i>amgS</i><sub>V121G</sub> mutation engineering primers</b> |                                                |            |
| <i>amgS_F</i>                                                   | 5'CCCCC <u>GAATTC</u> TTCTCCGTAAGCACGAGAGG 3'  | This study |
| <i>amgS_R</i>                                                   | 5' CCCCC <u>TCTAGA</u> AGCAGATGGATCGCCTTCTA 3' | This study |
| <b><i>amgS</i><sub>V121G</sub> mutation screening primers</b>   |                                                |            |
| <i>amgS_scr_F</i>                                               | 5' ATACACCTCGGCCATTTCAC 3'                     | This study |
| <i>amgS_scr_R</i>                                               | 5' CTGATGAACGAGGACGTGAT 3'                     | This study |
| <b>RT-qPCR Primers</b>                                          |                                                |            |
| <i>mexX_RT_F</i>                                                | 5' GGC CCT GGT CGC CCT ATT C 3'                | [7]        |
| <i>mexX_RT_R</i>                                                | 5' TCC TCG TAC AGG CGA CGG 3'                  | [7]        |
| <i>clpX_F</i>                                                   | 5' GTG GGC GAG GAT GTC GAG AAC 3'              | [7]        |
| <i>clpX_R</i>                                                   | 5' CGG TAC CCT CGA TGA GCT TCA G 3'            | [7]        |
| <i>oprL_F</i>                                                   | 5' CCA ACA GCG GTG CCG TTG A 3'                | [7]        |
| <i>oprL_R</i>                                                   | 5' GCC ATA TTG TAC TCG CGG GT 3'               | [7]        |
| <b>Universal primers</b>                                        |                                                |            |
| M13_F                                                           | GTA AAA CGA CGG CCA GT                         | Universal  |
| M13_R                                                           | CAG GAA ACA GCT ATG AC                         | Universal  |

<sup>a</sup>Introduced restriction sites are underlined.

1. Holloway, B. Genetic recombination in *Pseudomonas aeruginosa*. *Journal of General Microbiology* **1955**, 13, 572-581.

2. Thacharodi, A.; Lamont, I.L. Aminoglycoside resistance in *Pseudomonas aeruginosa*: the contribution of the MexXY-OprM efflux pump varies between isolates. *Journal of Medical Microbiology* **2022**, *71*, 001551.
3. Wardell, S.J.; Rehman, A.; Martin, L.W.; Winstanley, C.; Patrick, W.M.; Lamont, I.L. A large-scale whole-genome comparison shows that experimental evolution in response to antibiotics predicts changes in naturally evolved clinical *Pseudomonas aeruginosa*. *Antimicrob Agents Chemother.* **2019**, *63*, e01619-01619.
4. Yanisch-Perron, C.; Vieira, J.; Messing, J. Improved M13 phage cloning vectors and host strains: nucleotide sequences of the M13mpl8 and pUC19 vectors. *Gene* **1985**, *33*, 103-119.
5. Thoma, S.; Schobert, M. An improved *Escherichia coli* donor strain for diparental mating. *FEMS microbiology letters* **2009**, *294*, 127-132.
6. Hoang, T.T.; Karkhoff-Schweizer, R.R.; Kutchma, A.J.; Schweizer, H.P. A broad-host-range Flp-FRT recombination system for site-specific excision of chromosomally-located DNA sequences: application for isolation of unmarked *Pseudomonas aeruginosa* mutants. *Gene* **1998**, *212*, 77-86.
7. Martin, L.W.; Robson, C.L.; Watts, A.M.; Gray, A.R.; Wainwright, C.E.; Bell, S.C.; Ramsay, K.A.; Kidd, T.J.; Reid, D.W.; Brockway, B. Expression of *Pseudomonas aeruginosa* antibiotic resistance genes varies greatly during infections in cystic fibrosis patients. *Antimicrobial agents and chemotherapy* **2018**, *62*, e01789-01718.
